# Supplementary material
Source: publisher figshare collection journal article supplement (https://acs.figshare.com/ndownloader/files/5157364)
Supplement: Supplementary file 1 [file 5157364]

# **The Synthesis of Chiral $\beta^3$ -Aminoxy Peptides**

*Dan Yang,<sup>\*,†,‡</sup> Yu-Hui Zhang,<sup>†</sup> Bing Li,<sup>†</sup> and Dan-Wei Zhang<sup>‡</sup>*

Department of Chemistry, The University of Hong Kong, Pokfulam Road, Hong Kong, China  
and Department of Chemistry, Fudan University, Shanghai 200433, China

## **Supporting Information**

### **Contents**

|                                                                                                             |                   |
|-------------------------------------------------------------------------------------------------------------|-------------------|
| <b>1. Preparation and Characterization Data for Compounds 1- 46.....</b>                                    | <b>S2----S18</b>  |
| <b>2. Determination of Optical Purity of 13 and 14 by <math>^1\text{H}</math> NMR Spectroscopy.....</b>     | <b>S19----S22</b> |
| <b>3. Determination of Enantiomeric Excess of 27 by HPLC.....</b>                                           | <b>S23</b>        |
| <b>4. <math>^1\text{H}</math> and <math>^{13}\text{C}</math> NMR Spectral Copies of New Compounds .....</b> | <b>S24----S87</b> |

**General methods.** All reagents and solvents for reactions were of analytical grade and were dried and distilled if necessary.  $^1\text{H}$  and  $^{13}\text{C}$  NMR spectra were recorded at 300 or 400 MHz for protons and at 75.5 or 100.0 MHz for carbons on DPX 300 or 400 Fourier Transform Spectrometers. Infrared spectra were obtained on a FT-IR spectrometer. Melting points were determined with a microscope and were uncorrected. Optical rotations were measured on a polarimeter. Mass spectra were recorded with a mass spectrometer for both low resolution and high-resolution mass spectra.

Compounds **1–5** were prepared according to our previous work.<sup>1</sup>

**Characterization data for 1.** The NMR data is identical to that previously reported.<sup>1</sup>

**Characterization data for 2.** A white solid; m.p. 62–64 °C;  $[\alpha]_D^{20} = +70.9^\circ$  (c 1.02,  $\text{CHCl}_3$ );  $^1\text{H}$  NMR (300 MHz,  $\text{CDCl}_3$ )  $\delta$  7.86 (s, 1H), 7.77 (d,  $J = 7.4$  Hz, 2H), 7.59 (d,  $J = 7.3$  Hz, 2H), 7.41 (t,  $J = 7.3$  Hz, 2H), 7.31 (t,  $J = 7.3$  Hz, 2H), 4.46 (d,  $J = 7.0$  Hz, 2H), 4.33 (dd,  $J = 4.2, 7.4$  Hz, 1H), 4.25 (t,  $J = 7.0$  Hz, 1H), 1.94–1.84 (m, 1H), 1.74–1.64 (m, 2H), 1.50 (s, 9H), 0.99 (d,  $J = 6.7$  Hz, 3H), 0.95 (d,  $J = 6.7$  Hz, 3H);  $^{13}\text{C}$  NMR (67.94 MHz,  $\text{CDCl}_3$ )  $\delta$  171.4, 156.8, 143.5, 141.3, 127.8, 127.1, 125.1, 120.0, 82.8, 82.2, 67.6, 46.9, 39.8, 28.1, 24.6, 23.1, 21.8; IR ( $\text{CH}_2\text{Cl}_2$ ) 3379 (br, N–H), 1737 (C=O)  $\text{cm}^{-1}$ ; LRMS (EI, 20 eV)  $m/z$  425 ( $\text{M}^+$ , 1), 179 (30), 178 (100); HRMS (EI, 20 eV) calcd for  $\text{C}_{25}\text{H}_{31}\text{NO}_5$  ( $\text{M}^+$ ) 425.2202, found 425.2202.

**Characterization data for 3.** A white solid; m.p. 78–80 °C;  $[\alpha]_D^{20} = +64.1^\circ$  (c 1.02,  $\text{CHCl}_3$ );  $^1\text{H}$  NMR (300 MHz,  $\text{CDCl}_3$ )  $\delta$  7.91 (s, 1H), 7.37–7.29 (m, 5H), 5.19 (d,  $J = 12.1$  Hz, 1H), 5.13 (d,  $J = 12.1$  Hz, 1H), 4.31 (dd,  $J = 4.0, 9.6$  Hz, 1H), 1.96–1.85 (m, 1H), 1.70–1.52 (m, 2H), 1.47 (s, 9H), 0.94 (d,  $J = 6.5$  Hz, 3H), 0.93 (d,  $J = 6.7$  Hz, 3H);  $^{13}\text{C}$  NMR (75.47 MHz,  $\text{CDCl}_3$ )  $\delta$  171.4, 156.9, 135.5, 128.6, 128.4, 128.4, 82.8, 82.1, 67.5, 39.8, 28.1, 24.6, 23.1, 21.6; IR ( $\text{CH}_2\text{Cl}_2$ ) 3378 (br, N–H), 1755 (C=O), 1735 (C=O)  $\text{cm}^{-1}$ ; LRMS (EI, 20 eV)  $m/z$  337 ( $\text{M}^+$ , 6),

107 (20), 106 (16), 91 (100); HRMS (EI, 20 eV) calcd for  $C_{18}H_{27}NO_5$  ( $M^+$ ) 337.1889, found 337.1891.

**Characterization data for 4.** A colorless liquid;  $[\alpha]_D^{20} = +68.9^\circ$  ( $c$  1.01,  $CHCl_3$ );  $^1H$  NMR (300 MHz,  $CDCl_3$ )  $\delta$  7.86 (s, 1H), 7.41–7.33 (m, 5H), 5.22 (d,  $J = 12.1$  Hz, 1H), 5.17 (d,  $J = 12.1$  Hz, 1H), 4.14 (d,  $J = 9.6$  Hz, 1H), 2.21–2.10 (m, 1H), 1.51 (s, 9H), 1.08 (d,  $J = 7.0$  Hz, 3H), 1.00 (d,  $J = 7.0$  Hz, 3H);  $^{13}C$  NMR (75.47 MHz,  $CDCl_3$ )  $\delta$  170.4, 156.9, 135.6, 128.6, 128.4, 128.3, 88.6, 82.0, 67.4, 30.3, 28.1, 18.6, 17.3; IR ( $CH_2Cl_2$ ) 3380 (br, N–H), 1732 (C=O)  $cm^{-1}$ ; LRMS (EI, 20 eV)  $m/z$  324 ( $M^+ + 1$ , 27), 314 (36), 268 (81), 224 (13), 106 (27), 91 (100); HRMS (EI, 20 eV) calcd for  $C_{17}H_{25}NO_5$  ( $M^+$ ) 323.1733, found 323.1725.

**Characterization data for 5.** A colorless oil;  $[\alpha]_D^{20} = +100.9^\circ$  ( $c$  1.10,  $CH_2Cl_2$ );  $^1H$  NMR (270 MHz,  $CDCl_3$ )  $\delta$  8.00 (s, 1H), 4.25–4.13 (m, 2H), 4.09 (d,  $J = 4.9$  Hz, 1H), 2.19–2.07 (m, 1H), 1.50 (s, 9H), 1.28 (t,  $J = 6.9$  Hz, 3H), 1.07 (d,  $J = 6.9$  Hz, 3H), 0.99 (d,  $J = 6.9$  Hz, 3H);  $^{13}C$  NMR (67.80 MHz,  $CDCl_3$ )  $\delta$  170.2, 157.2, 88.5, 81.8, 61.7, 30.3, 28.1, 18.6, 17.3, 14.4; IR ( $CH_2Cl_2$ ) 3382 (br, N–H), 1733 (C=O)  $cm^{-1}$ ; FABMS 262 ( $M^+ + 1$ ).

**Preparation of 6.** A solution of compound **1** (500 mg, 1.50 mmol) in dichloromethane (4 mL) in an ice bath was treated with trifluoroacetic acid (4 mL). After stirring at room temperature for 1 h, the reaction mixture was concentrated under vacuum, and azeotroped with toluene. Then dry THF (10 mL) was added and the solution was cooled to  $-25^\circ C$  under  $N_2$ .  $Et_3N$  (229  $\mu L$ , 1.65 mmol) and ethyl chloroformate (158  $\mu L$ , 1.65 mmol) were added subsequently with stirring while the temperature was kept below  $-20^\circ C$ . After 15 min, a freshly prepared diazomethane solution in dry ether was added until the yellow color of the solution persisted. The mixture was allowed to warm up to  $0^\circ C$  and stirring was continued for 3 h. Acidification with dilute acetic acid or citric acid and addition of an equal volume of ether were followed by washing the

organic layer with water, saturated  $\text{NaHCO}_3$  and brine. Drying over  $\text{Na}_2\text{SO}_4$  and evaporation yielded the crude diazoketone, which was further purified by flash chromatography (30% EtOAc in *n*-Hexane) to give a light yellow solid **6** (312 mg, 69% yield). M.p. 70–71 °C;  $[\alpha]_D^{20} = +113.5^\circ$  (c 1.12,  $\text{CH}_2\text{Cl}_2$ );  $^1\text{H}$  NMR (300 MHz,  $\text{CDCl}_3$ )  $\delta$  7.85–7.68 (m, 4H), 6.44 (s, 1H), 4.84 (dd,  $J = 4.2, 9.1$  Hz, 1H), 2.12–2.01 (m, 1H), 1.90–1.80 (m, 1H), 1.70–1.59 (m, 1H), 1.09 (d,  $J = 6.5$  Hz, 3H), 1.00 (d,  $J = 6.6$  Hz, 3H);  $^{13}\text{C}$  NMR (75.47 MHz,  $\text{CDCl}_3$ )  $\delta$  194.3, 164.0, 135.2, 129.1, 124.1, 89.8, 54.3, 41.6, 24.9, 23.5, 22.2; IR ( $\text{CH}_2\text{Cl}_2$ ) 2113 ( $\text{CH}=\text{N}_2$ ), 1793 ( $\text{C}=\text{O}$ ), 1737 ( $\text{C}=\text{O}$ )  $\text{cm}^{-1}$ ; FABMS 302 ( $\text{M}^+ + 1$ ).

**Preparation of 7.** Following the procedure for the preparation of **6**, **7** was obtained from **2** as a light yellow solid (63% yield). M.p. 113–114 °C;  $[\alpha]_D^{20} = +99.3^\circ$  (c 1.27,  $\text{CH}_2\text{Cl}_2$ );  $^1\text{H}$  NMR (300 MHz,  $\text{CDCl}_3$ )  $\delta$  7.75 (d,  $J = 7.6$  Hz, 2H), 7.74 (s, 1H), 7.56 (d,  $J = 7.4$  Hz, 2H), 7.41 (t,  $J = 7.4$  Hz, 2H), 7.32 (t,  $J = 7.4$  Hz, 2H), 5.70 (s, 1H), 4.51 (d,  $J = 6.7$  Hz, 2H), 4.31 (dd,  $J = 6.8, 9.7$  Hz, 1H), 4.22 (t,  $J = 6.6$  Hz, 1H), 1.93–1.84 (m, 1H), 1.64–1.59 (m, 1H), 1.49–1.40 (m, 1H), 0.96 (d,  $J = 7.0$  Hz, 3H), 0.94 (d,  $J = 7.3$  Hz, 3H);  $^{13}\text{C}$  NMR (75.47 MHz,  $\text{CDCl}_3$ )  $\delta$  194.6, 157.1, 143.3, 141.3, 127.9, 127.2, 124.9, 120.1, 87.8, 67.6, 53.5, 46.9, 40.3, 24.6, 23.2, 21.9; IR ( $\text{CH}_2\text{Cl}_2$ ) 3366 (br, N–H), 1758 ( $\text{C}=\text{O}$ ), 1733 ( $\text{C}=\text{O}$ )  $\text{cm}^{-1}$ ; FABMS 394 ( $\text{M}^+ + 1$ ).

**Preparation of 8.** Following the procedure for the preparation of **6**, **8** was obtained from **3** as a light yellow solid (58% yield). M.p. 69–70 °C;  $[\alpha]_D^{20} = +195.4^\circ$  (c 1.01,  $\text{CHCl}_3$ );  $^1\text{H}$  NMR (300 MHz,  $\text{CDCl}_3$ )  $\delta$  7.76 (s, 1H), 7.39–7.33 (m, 5H), 5.76 (s, 1H), 5.17 (s, 2H), 4.32 (dd,  $J = 4.0, 9.7$  Hz, 1H), 1.91–1.84 (m, 1H), 1.66–1.58 (m, 1H), 1.48–1.40 (m, 1H), 0.95 (d,  $J = 2.8$  Hz, 3H), 0.92 (d,  $J = 2.9$  Hz, 3H);  $^{13}\text{C}$  NMR (75.47 MHz,  $\text{CDCl}_3$ )  $\delta$  194.8, 157.2, 135.2, 128.7, 128.6,

128.4, 87.9, 67.8, 53.2, 40.4, 24.6, 23.1, 21.7; IR (CH<sub>2</sub>Cl<sub>2</sub>) 3374 (br, N–H), 2112 (CH=N<sub>2</sub>), 1757 (C=O) cm<sup>-1</sup>; FABMS 306 (M<sup>+</sup> + 1).

**Preparation of 9.** Following the procedure for the preparation of **6**, **9** was obtained from **4** as a light yellow oil (68% yield).  $[\alpha]_D^{20} = + 86.3^\circ$  (*c* 1.01, CHCl<sub>3</sub>); <sup>1</sup>H NMR (300 MHz, CDCl<sub>3</sub>) δ 7.69 (s, 1H), 7.38–7.33 (m, 5H), 5.79 (s, 1H), 5.16 (s, 2H), 4.04 (d, *J* = 5.6 Hz, 1H), 2.08–2.01 (m, 1H), 1.02 (d, *J* = 6.7 Hz, 3H), 0.99 (d, *J* = 6.3 Hz, 3H); <sup>13</sup>C NMR (75.47 MHz, CDCl<sub>3</sub>) δ 194.2, 157.2, 135.3, 128.6, 128.6, 128.4, 94.1, 67.8, 54.1, 30.8, 18.8, 17.6; IR (CH<sub>2</sub>Cl<sub>2</sub>) 3367 (br, N–H), 2112 (CH=N<sub>2</sub>), 1756 (C=O) cm<sup>-1</sup>; APCI-MS 291 (M<sup>+</sup>).

**Preparation of 10.** Following the procedure for the preparation of **6**, **10** was obtained from **5** as a light yellow liquid (65% yield).  $[\alpha]_D^{20} = + 144.4^\circ$  (*c* 0.99, CH<sub>2</sub>Cl<sub>2</sub>); <sup>1</sup>H NMR (300 MHz, CDCl<sub>3</sub>) δ 7.61 (s, 1H), 5.84 (s, 1H), 4.21 (q, *J* = 7.1 Hz, 2H), 4.05 (d, *J* = 5.6 Hz, 1H), 2.09–2.03 (m, 1H), 1.28 (t, *J* = 7.2 Hz, 3H), 1.04 (t, *J* = 6.7 Hz, 6H); <sup>13</sup>C NMR (75.47 MHz, CDCl<sub>3</sub>) δ 194.4, 157.5, 94.0, 62.2, 54.1, 30.8, 18.8, 17.6, 14.4; IR (CH<sub>2</sub>Cl<sub>2</sub>) 3377 (br, N–H), 2112 (CH=N<sub>2</sub>), 1756 (C=O), 1725 (C=O) cm<sup>-1</sup>.

**Preparation of 12.** A solution of diazoketone **6** (300 mg, 1.00 mmol) in THF (10 mL) and H<sub>2</sub>O (1 mL) at –20 °C was added a solution of CF<sub>3</sub>COOAg (24 mg, 0.11 mmol) in Et<sub>3</sub>N (402 μL, 2.9 mmol) under N<sub>2</sub> with exclusion of light. After 3 h, ether was added and the mixture was extracted with sat. NaHCO<sub>3</sub> solution. The organic phase was dried over Na<sub>2</sub>SO<sub>4</sub> and evaporated. The residue was purified by flash chromatography (30% EtOAc in *n*-Hexane) to give **12** as a white solid (169 mg, 69% yield). M.p. 87–88 °C; <sup>1</sup>H NMR (300 MHz, CDCl<sub>3</sub>) δ 7.89 (dd, *J* = 3.2, 5.5 Hz, 2H), 7.79 (dd, *J* = 3.2, 5.4 Hz, 2H), 7.30 (dt, *J* = 7.5, 15.6 Hz, 1H), 6.08 (d, *J* = 15.7 Hz, 1H), 2.22 (t, *J* = 6.9 Hz, 2H), 1.89–1.80 (m, 1H), 0.97 (d, *J* = 6.7 Hz, 6H); <sup>13</sup>C NMR (75.47 MHz,

CDC<sub>3</sub>)  $\delta$  161.3, 161.1, 154.0, 133.7, 127.9, 122.9, 115.4, 41.1, 26.7, 21.4; IR (CH<sub>2</sub>Cl<sub>2</sub>) 1732 (C=O), 1650 (C=C) cm<sup>-1</sup>; LRMS (EI, 70 eV)  $m/z$  247 (M<sup>+</sup>+2, 2), 163 (12), 111 (100); HRMS (EI, 70 eV) calcd for C<sub>14</sub>H<sub>15</sub>NO<sub>3</sub> (M<sup>+</sup>) 245.1052, found 245.1061.

**Preparation of 13.** A solution of diazoketone **8** (285 mg, 0.93 mmol) in THF (9 mL) was stirred at -78 °C, then a solution of PhCOOAg (23 mg, 0.10 mmol) in Et<sub>3</sub>N (387  $\mu$ L, 2.79 mmol) was added under N<sub>2</sub> with exclusion of light. After 24 h, ether was added to dilute the solution, which was then extracted with sat. NaHCO<sub>3</sub> solution. The organic phase was dried over Na<sub>2</sub>SO<sub>4</sub> and evaporated. The residue was purified by flash chromatography (30% EtOAc in *n*-Hexane) to give **13** as a white solid (176 mg, 68% yield). M.p. 79–80 °C;  $[\alpha]_D^{20} = +19.1^\circ$  (*c* 0.99, CHCl<sub>3</sub>); <sup>1</sup>H NMR (300 MHz, CDC<sub>3</sub>)  $\delta$  7.46–7.33 (m, 5H), 5.34 (s, 2H), 4.65–4.58 (m, 1H), 2.90 (dd, *J* = 6.6, 16.7 Hz, 1H), 2.63 (dd, *J* = 9.8, 16.7 Hz, 1H), 1.84–1.81 (m, 2H), 1.58–1.50 (m, 1H), 0.96 (d, *J* = 6.0 Hz, 3H), 0.94 (d, *J* = 6.0 Hz, 3H); <sup>13</sup>C NMR (67.5 MHz, CDC<sub>3</sub>)  $\delta$  167.7, 147.8, 134.7, 128.6, 128.5, 78.0, 68.7, 41.9, 39.9, 24.8, 22.7, 22.5; IR (CH<sub>2</sub>Cl<sub>2</sub>) 1793 (C=O), 1746 (C=O) cm<sup>-1</sup>; FABMS 278 (M<sup>+</sup> + 1); HRMS (EI, 20 eV) calcd for C<sub>15</sub>H<sub>19</sub>NO<sub>4</sub> (M<sup>+</sup>) 277.1314, found 277.1285.

**Preparation of 14.** Following the procedure for the preparation of **13**, **14** was obtained from **9** as a white solid (64% yield). M.p. 70–71 °C;  $[\alpha]_D^{20} = +21.6^\circ$  (*c* 0.99, CHCl<sub>3</sub>); <sup>1</sup>H NMR (300 MHz, CDC<sub>3</sub>)  $\delta$  7.46–7.31 (m, 5H), 5.34 (s, 2H), 4.27 (dt, *J* = 7.2, 10.0 Hz, 1H), 2.82 (dd, *J* = 7.0, 16.8 Hz, 1H), 2.72 (dd, *J* = 10.0, 16.8 Hz, 1H), 2.04–1.93 (m, 1H), 1.04 (d, *J* = 6.7 Hz, 3H), 0.95 (d, *J* = 6.8 Hz, 3H); <sup>13</sup>C NMR (67.94 MHz, CDC<sub>3</sub>)  $\delta$  167.7, 147.7, 134.7, 128.6, 128.4, 83.8, 68.7, 37.1, 31.1, 18.2, 17.5; IR (CH<sub>2</sub>Cl<sub>2</sub>) 1791 (C=O), 1746 (C=O) cm<sup>-1</sup>; FABMS 264 (M<sup>+</sup> + 1); HRMS (EI, 20 eV) calcd for C<sub>14</sub>H<sub>17</sub>NO<sub>4</sub> (M<sup>+</sup>) 263.1158, found 263.1181.

**Preparation of 15.** Following the procedure for the preparation of **13**, **15** was obtained from **10** as a colorless liquid (98% yield).  $[\alpha]_D^{20} = +14.3^\circ$  (c 1.50,  $\text{CH}_2\text{Cl}_2$ );  $^1\text{H}$  NMR (300 MHz,  $\text{CDCl}_3$ )  $\delta$  4.37 (q,  $J = 7.1$  Hz, 2H), 4.28 (dt,  $J = 7.2, 10.0$  Hz, 1H), 2.84 (dd,  $J = 7.0, 16.8$  Hz, 1H), 2.73 (dd,  $J = 10.0, 16.9$  Hz, 1H), 2.06–1.94 (m, 1H), 1.38 (t,  $J = 7.1$  Hz, 3H), 1.05 (d,  $J = 6.7$  Hz, 3H), 0.97 (d,  $J = 6.8$  Hz, 3H);  $^{13}\text{C}$  NMR (67.80 MHz,  $\text{CDCl}_3$ )  $\delta$  167.4, 147.5, 83.6, 63.5, 37.0, 30.9, 18.1, 17.4, 14.2; IR ( $\text{CH}_2\text{Cl}_2$ ) 1789 (C=O), 1747 (C=O)  $\text{cm}^{-1}$ ; LRMS (EI, 20 eV)  $m/z$  201 ( $\text{M}^+$ , 2), 129 (50), 97 (29), 86 (100); HRMS (EI, 20 eV) calcd for  $\text{C}_9\text{H}_{15}\text{NO}_4$  ( $\text{M}^+$ ) 201.1001, found 201.0977.

**Preparation of 16.** To a solution of diazoketone **7** (112 mg, 0.29 mmol) and *iso*-butylamine (42.7  $\mu\text{L}$ , 0.43 mmol) in THF (8 mL) at  $-78^\circ\text{C}$  were added  $\text{PhCOOAg}$  (20 mg, 0.09 mmol) and  $\text{Et}_3\text{N}$  (115  $\mu\text{L}$ , 0.83 mmol) under  $\text{N}_2$  with exclusion of light. After 3 h, ether was added to dilute the solution, which was then extracted with sat.  $\text{NaHCO}_3$  solution. The organic phase was dried over  $\text{Na}_2\text{SO}_4$  and evaporated. The residue was purified by flash column chromatography (30%  $\text{EtOAc}$  in *n*-Hexane) to give **16** as a colorless oil (74 mg, 58% yield).  $[\alpha]_D^{20} = +21.2^\circ$  (c 1.00,  $\text{CHCl}_3$ );  $^1\text{H}$  NMR (270 MHz,  $\text{CDCl}_3$ )  $\delta$  7.77 (d,  $J = 7.5$  Hz, 2H), 7.68 (s, 1H), 7.57 (d,  $J = 7.6$  Hz, 2H), 7.42 (s, 1H), 7.41 (t,  $J = 7.5$  Hz, 2H), 7.32 (t,  $J = 7.5$  Hz, 2H), 4.53 (dd,  $J = 6.8, 10.7$  Hz, 1H), 4.50 (dd,  $J = 6.7, 10.7$  Hz, 1H), 4.23 (t,  $J = 6.6$  Hz, 1H), 4.10–4.06 (m, 1H), 3.13 (dt,  $J = 6.7, 13.1$  Hz, 1H), 3.04 (dt,  $J = 6.7, 13.0$  Hz, 1H), 2.55 (dd,  $J = 2.8, 15.2$  Hz, 1H), 2.34 (dd,  $J = 6.7, 15.2$  Hz, 1H), 1.84–1.80 (m, 1H), 1.79–1.70 (m, 1H), 1.60–1.55 (m, 1H), 1.38–1.32 (m, 1H), 0.92 (d,  $J = 6.6$  Hz, 3H), 0.91 (d,  $J = 6.7$  Hz, 6H), 0.89 (d,  $J = 6.7$  Hz, 3H);  $^{13}\text{C}$  NMR (125.77 MHz,  $\text{CDCl}_3$ )  $\delta$  170.2, 158.5, 143.4, 143.3, 141.4, 127.9, 127.2, 124.9, 124.9, 120.1, 82.2, 67.7, 47.1, 47.1, 41.1, 40.3, 28.4, 24.8, 22.8, 22.6, 20.2; IR ( $\text{CH}_2\text{Cl}_2$ ) 3439 (br, N–H), 3350 (br, N–H),

1660 (C=O)  $\text{cm}^{-1}$ ; LRMS (EI, 20 eV)  $m/z$  438 ( $\text{M}^+$ , 1), 184 (34), 179 (19), 178 (100); HRMS (EI, 20 eV) calcd for  $\text{C}_{26}\text{H}_{34}\text{N}_2\text{O}_4$  ( $\text{M}^+$ ) 438.2519, found 438.2521.

**Preparation of 17.** A solution of **13** (277 mg, 1 mmol), DMAP (134 mg, 1.1 mmol), and *iso*-butylamine (152  $\mu\text{L}$ , 1.1 mmol) in THF (10 mL) were refluxed for 6 h. The solvent was removed under reduced pressure, and the residue was purified by flash column chromatography (40% EtOAc in *n*-Hexane) to afford compound **17** as a colorless oil (287 mg, 82% yield).  $[\alpha]_{\text{D}}^{20} = +20.8^\circ$  ( $c$  1.02,  $\text{CHCl}_3$ );  $^1\text{H}$  NMR (300 MHz,  $\text{CDCl}_3$ )  $\delta$  7.83 (s, 1H), 7.59 (s, 1H), 7.39–7.31 (m, 5H), 5.17 (s, 2H), 4.12–4.05 (m, 1H), 3.13 (dt,  $J = 6.5, 13.1$  Hz, 1H), 3.02 (dt,  $J = 6.4, 13.0$  Hz, 1H), 2.58 (dd,  $J = 2.9, 15.2$  Hz, 1H), 2.36 (dd,  $J = 6.7, 15.2$  Hz, 1H), 1.89–1.81 (m, 1H), 1.79–1.67 (m, 1H), 1.61 (dt,  $J = 7.7, 14.1$  Hz, 1H), 1.34 (ddd,  $J = 1.7, 5.7, 7.4$  Hz, 1H), 0.92 (d,  $J = 6.7$  Hz, 6H), 0.88 (d,  $J = 6.6$  Hz, 6H);  $^{13}\text{C}$  NMR (75.47 MHz,  $\text{CDCl}_3$ )  $\delta$  170.3, 158.5, 135.3, 128.6, 128.6, 128.4, 82.1, 67.9, 47.0, 41.0, 40.2, 28.3, 24.7, 22.8, 22.5, 20.2; IR ( $\text{CH}_2\text{Cl}_2$ ) 3448 (br, N–H), 3354 (br, N–H), 1745 (C=O)  $\text{cm}^{-1}$ ; LRMS (EI, 70 eV)  $m/z$  350 ( $\text{M}^+$ , 4), 185 (11), 184 (97), 91 (100); HRMS (EI, 70 eV) calcd for  $\text{C}_{26}\text{H}_{34}\text{N}_2\text{O}_4$  ( $\text{M}^+$ ) 350.2206, found 350.2202.

**Preparation of 18.** A solution of **13** (277 mg, 1 mmol), DMAP (134 mg, 1.1 mmol), and *p*-anisidine (135 mg, 1.1 mmol) in THF (10 mL) was refluxed for 24 h. The resulting solution was diluted with ether, and washed with sat.  $\text{NH}_4\text{Cl}$  and NaCl solution, then the organic layer was dried over  $\text{Na}_2\text{SO}_4$  and evaporated. The residue was purified by flash column chromatography (30% EtOAc in *n*-Hexane) to afford compound **18** as a light yellow solid (312 mg, 79%). M.p. 86–87  $^\circ\text{C}$ ;  $[\alpha]_{\text{D}}^{20} = +64.7^\circ$  ( $c$  1.03,  $\text{CH}_2\text{Cl}_2$ );  $^1\text{H}$  NMR (300 MHz,  $\text{CDCl}_3$ )  $\delta$  9.63 (s, 1H), 7.70 (s, 1H), 7.60 (d,  $J = 9.0$  Hz, 2H), 7.44–7.30 (m, 5H), 6.86 (d,  $J = 9.0$  Hz, 2H), 5.24 (d,  $J = 12.0$  Hz, 1H), 5.19 (d,  $J = 12.0$  Hz, 1H), 4.19–4.11 (m, 1H), 3.79 (s, 3H), 2.77 (dd,  $J = 2.5, 15.2$  Hz, 1H), 2.45 (dd,  $J = 6.6, 15.1$  Hz, 1H), 1.81–1.57 (m, 2H), 1.44–1.35 (m, 1H), 0.91 (d,  $J = 6.6$  Hz, 3H),



0.89 (d,  $J = 6.6$  Hz, 3H);  $^{13}\text{C}$  NMR (75.47 MHz,  $\text{CDCl}_3$ )  $\delta$  168.4, 159.1, 155.9, 135.0, 132.1, 128.8, 128.7, 128.5, 121.5, 113.9, 82.2, 68.2, 55.5, 41.2, 40.7, 24.8, 22.8, 22.5; IR ( $\text{CH}_2\text{Cl}_2$ ) 3321 (br, N-H), 1738 (C=O)  $\text{cm}^{-1}$ ; LRMS (EI, 20 eV)  $m/z$  400 ( $\text{M}^+$ , 17), 234 (18), 124 (13), 123 (100); HRMS (EI, 20 eV) calcd for  $\text{C}_{22}\text{H}_{28}\text{N}_2\text{O}_5$  ( $\text{M}^+$ ) 400.1998, found 400.2005.

**Preparation of 19.** Following the procedure for the preparation of **18**, **19** was obtained from **13** as a white solid (70% yield). M.p. 49–50 °C;  $[\alpha]_{\text{D}}^{20} = + 52.6^\circ$  ( $c$  1.00,  $\text{CHCl}_3$ );  $^1\text{H}$  NMR (300 MHz,  $\text{CDCl}_3$ )  $\delta$  9.64 (s, 1H), 7.71 (s, 1H), 7.56 (d,  $J = 8.4$  Hz, 2H), 7.37 (m, 5H), 7.11 (d,  $J = 8.3$  Hz, 2H), 5.25 (d,  $J = 12.0$  Hz, 2H), 5.20 (d,  $J = 12.0$  Hz, 2H), 4.18–4.11 (m, 1H), 2.78 (dd,  $J = 2.6, 15.0$  Hz, 1H), 2.45 (dd,  $J = 6.4, 15.1$  Hz, 1H), 2.31 (s, 3H), 1.85–1.79 (m, 1H), 1.77–1.61 (m, 1H), 1.59–1.35 (m, 1H), 0.91 (d,  $J = 6.6$  Hz, 3H), 0.89 (d,  $J = 6.7$  Hz, 3H);  $^{13}\text{C}$  NMR (75.47 MHz,  $\text{CDCl}_3$ )  $\delta$  168.5, 159.1, 136.2, 135.1, 133.2, 129.3, 128.7, 128.7, 128.5, 119.9, 82.3, 68.2, 41.3, 40.7, 24.8, 22.8, 22.4, 20.9; IR ( $\text{CH}_2\text{Cl}_2$ ) 3321 (br, N-H), 1791 (C=O), 1741 (C=O)  $\text{cm}^{-1}$ ; LRMS (EI, 20 eV)  $m/z$  384 ( $\text{M}^+$ , 15), 218 (46), 134 (13), 108 (20), 107 (100); HRMS (EI, 20 eV) calcd for  $\text{C}_{22}\text{H}_{28}\text{N}_2\text{O}_4$  ( $\text{M}^+$ ) 384.2049, found 384.2052.

**Preparation of 20.** Following the procedure for the preparation of **18**, **20** was obtained from **14** as a colorless oil (65% yield).  $[\alpha]_{\text{D}}^{20} = - 16.6^\circ$  ( $c$  0.18,  $\text{CHCl}_3$ );  $^1\text{H}$  NMR (300 MHz,  $\text{CDCl}_3$ )  $\delta$  8.07 (s, 1H), 7.64 (s, 1H), 7.58–7.20 (m, 10H), 5.15 (d,  $J = 12.0$  Hz, 1H), 5.09 (d,  $J = 12.0$  Hz, 1H), 4.52 (dd,  $J = 6.2, 14.8$  Hz, 1H), 4.42 (dd,  $J = 5.7, 14.8$  Hz, 1H), 3.93 (ddd,  $J = 3.2, 5.4, 8.0$  Hz, 1H), 2.50 (dd,  $J = 3.2, 16.3$  Hz, 1H), 2.44 (dd,  $J = 7.9, 16.3$  Hz, 1H), 2.15–2.02 (m, 1H), 0.93 (d,  $J = 7.4$  Hz, 3H), 0.91 (d,  $J = 7.4$  Hz, 3H);  $^{13}\text{C}$  NMR (75.47 MHz,  $\text{CDCl}_3$ )  $\delta$  170.7, 158.3, 138.9, 135.2, 128.6, 128.5, 128.4, 127.8, 127.0, 87.8, 67.9, 43.4, 35.9, 29.1, 18.6, 16.5; IR ( $\text{CH}_2\text{Cl}_2$ ) 3446 (br, N-H), 1750 (C=O)  $\text{cm}^{-1}$ ; LRMS (EI, 20 eV)  $m/z$  370 ( $\text{M}^+$ , 15), 279 (31), 204 (100); HRMS (EI, 20 eV) calcd for  $\text{C}_{21}\text{H}_{26}\text{N}_2\text{O}_4$  ( $\text{M}^+$ ) 370.1893, found 370.1894.

**Preparation of 21.** Following the procedure for the preparation of **18**, **21** was obtained from **14** as a white solid (59% yield). M.p. 86–87 °C;  $[\alpha]_D^{20} = +35.8^\circ$  (*c* 0.30, CHCl<sub>3</sub>); <sup>1</sup>H NMR (300 MHz, CDCl<sub>3</sub>) δ 9.87 (s, 1H), 7.79 (s, 1H), 7.67 (d, *J* = 8.8 Hz, 2H), 7.45–7.28 (m, 5H), 7.25 (d, *J* = 8.9 Hz, 2H), 5.24 (d, *J* = 12.0 Hz, 1H), 5.20 (d, *J* = 12.0 Hz, 1H), 3.87 (ddd, *J* = 2.1, 7.3, 8.8 Hz, 1H), 2.68 (dd, *J* = 2.2, 16.1 Hz, 1H), 2.51 (dd, *J* = 7.5, 16.1 Hz, 1H), 2.13–2.04 (m, 1H), 0.96 (d, *J* = 6.7 Hz, 3H), 0.94 (d, *J* = 6.7 Hz, 3H); <sup>13</sup>C NMR (75.47 MHz, CDCl<sub>3</sub>) δ 169.0, 158.9, 137.4, 134.9, 128.8, 128.7, 128.7, 128.6, 128.5, 121.4, 88.1, 68.3, 37.4, 29.1, 18.9, 16.9; IR (CH<sub>2</sub>Cl<sub>2</sub>) 1745 (C=O) cm<sup>-1</sup>; LRMS (EI, 20 eV) *m/z* 390 (M<sup>+</sup>, 6), 224 (42), 127 (69), 91 (100); HRMS (EI, 20 eV) calcd for C<sub>20</sub>H<sub>23</sub>N<sub>2</sub>O<sub>4</sub>Cl (M<sup>+</sup>) 390.1346, found 390.1346.

**Preparation of 22.** A solution of **15** (100.5 mg, 0.5 mmol), DMAP (67.1 mg, 0.55 mmol), and *p*-toluidine (59 mg, 0.55 mmol) in toluene (8 mL) was refluxed for 24 h. The resulting solution was diluted with ether, and washed with sat. NH<sub>4</sub>Cl and NaCl solution. Then the organic layer was dried over Na<sub>2</sub>SO<sub>4</sub> and evaporated. The residue was purified by flash column chromatography (40 % EtOAc in *n*-Hexane) to afford compound **22** as a white solid (149 mg, 97 %). M.p. 96–98 °C;  $[\alpha]_D^{20} = +48.7^\circ$  (*c* 0.56, CH<sub>2</sub>Cl<sub>2</sub>); <sup>1</sup>H NMR (300 MHz, CDCl<sub>3</sub>) δ 9.68 (s, 1H), 7.64 (s, 1H), 7.62 (d, *J* = 8.7 Hz, 2H), 7.16 (d, *J* = 8.3 Hz, 2H), 4.36–4.26 (m, 2H), 3.93 (ddd, *J* = 2.3, 7.4, 9.0 Hz, 1H), 2.74 (dd, *J* = 2.3, 15.9 Hz, 1H), 2.58 (dd, *J* = 7.5, 15.9 Hz, 1H), 2.36 (s, 3H), 2.21–2.10 (m, 1H), 1.35 (t, *J* = 7.2 Hz, 3H), 1.04 (d, *J* = 6.9 Hz, 3H), 1.02 (d, *J* = 6.9 Hz, 3H); <sup>13</sup>C NMR (75.47 MHz, CDCl<sub>3</sub>) δ 168.8, 158.9, 136.2, 133.2, 129.2, 120.2, 87.1, 62.6, 37.4, 29.1, 20.8, 18.9, 17.1, 14.4; IR (CH<sub>2</sub>Cl<sub>2</sub>) 3319 (N–H), 3200 (N–H), 33134 (br, N–H), 1789 (C=O), 1739 (C=O) cm<sup>-1</sup>; LRMS (EI, 20 eV) *m/z* 308 (M<sup>+</sup>, 14), 203 (31), 107 (100); HRMS (EI, 20 eV) calcd for C<sub>16</sub>H<sub>24</sub>N<sub>2</sub>O<sub>4</sub> (M<sup>+</sup>) 308.1736, found 308.1739.

**Preparation of 24.** Compound **17** (100 mg, 0.29 mmol) was treated with HBr in acetic acid (40%, 2 mL). After stirring at room temperature for 6 h, the reaction mixture was concentrated under vacuum, and azeotroped with toluene to afford **23** as a colorless oil (57 mg). A solution of **13** (80 mg, 0.29 mmol), DMAP (40 mg, 0.32 mmol), and compound **23** (57 mg, 0.26 mmol) in THF (10 mL) was refluxed for 16 h. The solvent was removed under reduced pressure, and the residue was purified by flash column chromatography (50% EtOAc in *n*-Hexane) to afford compound **24** as a colorless oil (107 mg, 72% yield).  $[\alpha]_D^{20} = +32.9^\circ$  (c 1.00, CHCl<sub>3</sub>); <sup>1</sup>H NMR (270 MHz, CDCl<sub>3</sub>)  $\delta$  10.91 (s, 1H), 8.54 (t, *J* = 3.9 Hz, 1H), 7.51 (s, 1H), 7.41–7.34 (m, 5H), 5.22 (d, *J* = 11.9 Hz, 1H), 5.17 (d, *J* = 11.9 Hz, 1H), 4.14–4.05 (m, 2H), 3.17 (dt, *J* = 6.4, 13.1 Hz, 1H), 3.06 (dt, *J* = 6.3, 13.1 Hz, 1H), 2.60 (dd, *J* = 2.5, 15.6 Hz, 2H), 2.38 (dd, *J* = 6.0, 15.5 Hz, 1H), 2.34 (dd, *J* = 7.0, 15.6 Hz, 1H), 1.90–1.81 (m, 2H), 1.78–1.61 (m, 2H), 1.45–1.32 (m, 3H), 0.96 (d, *J* = 7.0 Hz, 6H), 0.93 (d, *J* = 6.7 Hz, 6H), 0.92 (d, *J* = 6.1 Hz, 6H); <sup>13</sup>C NMR (67.94 MHz, CDCl<sub>3</sub>)  $\delta$  170.2, 168.7, 159.3, 134.8, 128.9, 128.8, 128.8, 105.1, 81.7, 81.6, 68.5, 47.1, 40.8, 40.3, 37.9, 28.4, 24.8, 24.7, 22.8, 22.6, 22.6, 20.3; IR (CH<sub>2</sub>Cl<sub>2</sub>) 3442 (br, N–H), 3355 (br, N–H), 3286 (br, N–H), 3233 br, (N–H), 1734 (C=O), 1657 (C=O) cm<sup>-1</sup>; LRMS (EI, 20 eV) *m/z* 493 (M<sup>+</sup>, 3), 184 (59), 144 (34), 128 (22), 111 (63), 91 (100); HRMS (EI, 20 eV) calcd for C<sub>26</sub>H<sub>43</sub>N<sub>3</sub>O<sub>6</sub> (M<sup>+</sup>) 493.3152, found 493.3188.

**Preparation of 27.** To a suspension of baker's yeast (50 g) in H<sub>2</sub>O (40 mL) and petroleum spirit (300 mL) was added *tert*-butyl acetoacetate (1 mL, 6.03 mmol). After kept stirring for 24 h at room temperature, the mixture was filtered and the baker's yeast was washed with EtOAc. The combined organic layer was washed with brine, dried (MgSO<sub>4</sub>), concentrated in vacuum and purified by flash column chromatography (10% EtOAc in *n*-Hexane) to give **27** (0.605 g, 63%

yield) as an oil. 93 % ee (determined by HPLC);  $[\alpha]^{20}_{\text{D}} = + 36.0^{\circ}$  (*c* 1.08,  $\text{CHCl}_3$ ), Lit.<sup>2</sup>  $[\alpha]^{20}_{\text{D}} = + 34.0^{\circ}$  (*c* 1,  $\text{CHCl}_3$ ). The NMR data is identical to that previously reported.<sup>2</sup>

**Preparation of 28.** The experimental procedure is the same as that previously reported.<sup>3</sup>

**Preparation of 29.** To the suspension of  $\text{LiAlH}_4$  (2.384 g, 62.82 mmol) in ether (20 mL) was added a solution of compound **27** (5.000 g, 31.41 mmol) in ether (20 mL) at 0 °C. After kept stirring for 10 h at room temperature, the reaction was quenched with  $\text{H}_2\text{O}$  (1.2 mL), followed by 30%  $\text{NaOH}$  (1.5 mL) after 10 min, and finally 1.2 mL of water. Then the mixture was kept stirring overnight. The reaction mixture was filtered on a  $\text{MgSO}_4$  pad. The filtrate was dried with  $\text{MgSO}_4$ , concentrated in vacuum and purified by flash column chromatography (30%  $\text{EtOAc}$  in  $\text{CH}_2\text{Cl}_2$ ) to give **29** (2.517g, 89% yield) as an oil.  $[\alpha]^{20}_{\text{D}} = + 28.0^{\circ}$  (*c* 1.06,  $\text{EtOH}$ ), Lit.<sup>4</sup>  $[\alpha]^{21}_{\text{D}} = - 28.7^{\circ}$  (*c* 3.2,  $\text{EtOH}$ ) for the enantiomer of **29**; the NMR data is identical to that previously reported.<sup>4</sup>

**Preparation of 30.** Following the procedure for the preparation of **29**, **30** was obtained from **28** as an oil (56%).  $[\alpha]^{20}_{\text{D}} = + 16.6^{\circ}$  (*c* 1.04,  $\text{EtOH}$ ); the NMR data is identical to that previously reported.<sup>5</sup>

**Preparation of 31.** To the solution of compound **29** (1.353 g, 15.02 mmol) in DMF (12 mL) were added triphenylmethyl chloride (4.653 g, 16.53 mmol), 4-dimethylaminopyridine (0.185 g, 1.50 mmol), and  $\text{Et}_3\text{N}$  (3.14 mL, 22.53 mmol) at 0 °C. Then the solution was warmed to room temperature and kept stirring for 14 h. The reaction mixture was poured into ice water, extracted with  $\text{CH}_2\text{Cl}_2$  3 times. The combined organic layer was washed successively with sat.  $\text{NH}_4\text{Cl}$ , water, and brine, then dried ( $\text{MgSO}_4$ ), concentrated in vacuum and purified by flash column chromatography (10%  $\text{EtOAc}$  in *n*-Hexane) to give **31** (4.590 g, 92% yield) as a solid. M.p. 63–64 °C;  $[\alpha]^{20}_{\text{D}} = + 2.3^{\circ}$  (*c* 2.30,  $\text{EtOH}$ ), Lit.<sup>6</sup>  $[\alpha]^{22}_{\text{D}} = - 2.5^{\circ}$  (*c* 1.12,  $\text{EtOH}$ ) for the enantiomer

of **31**; LRMS (EI, 20 eV)  $m/z$  332 ( $M^+$ , 5), 259 (41), 243 (95), 241 (100); HRMS (EI, 20 eV) calcd for  $C_{23}H_{24}O_2$  ( $M^+$ ) 332.1776, found 332.1779. The NMR data is identical to that previously reported.<sup>6</sup>

**Preparation of 32.** Following the procedure for the preparation of **31**, **32** was obtained from **30** as an oil (97% yield):  $[\alpha]_D^{20} = -9.6^\circ$  ( $c$  0.78,  $CH_2Cl_2$ );  $^1H$  NMR (300 MHz,  $CDCl_3$ )  $\delta$  7.51–7.16 (m, 15H), 3.68–3.64 (m, 1H), 3.41–3.35 (m, 1H), 3.26–3.19 (m, 1H), 2.86 (d,  $J = 2.9$  Hz, 1H), 1.79–1.67 (m, 2H), 1.51–1.37 (m, 2H), 0.92 (t,  $J = 7.4$  Hz, 3H);  $^{13}C$  NMR (75.47 MHz,  $CDCl_3$ )  $\delta$  143.8, 128.5, 127.8, 126.9, 87.2, 72.6, 62.6, 36.2, 30.1, 9.9; IR ( $CH_2Cl_2$ ) 3525 (br, O–H)  $cm^{-1}$ ; LRMS (EI, 20 eV)  $m/z$  346 ( $M^+$ , 4), 259 (34), 242 (100), 165 (30); HRMS (EI, 20 eV) calcd for  $C_{24}H_{26}O_2$  ( $M^+$ ) 346.1933, found 346.1940.

**Preparation of 33.** To the solution of compound **31** (0.205 g, 0.617 mmol), N-hydroxyphthalimide (0.109 g, 0.648 mmol), and  $PPh_3$  (0.178 g, 0.678 mmol) in THF (5 mL) was added diisopropylazodicarboxylate (0.126 mL, 0.646 mmol) at 0  $^\circ C$ . After 1 h, the reaction was warmed to room temperature and kept stirring overnight, then concentrated in vacuum and purified by flash column chromatography directly (10% EtOAc in *n*-Hexane) to give **33** (0.277 g, 94% yield) as a solid. M.p. 98–99  $^\circ C$ ;  $[\alpha]_D^{20} = +9.6^\circ$  ( $c$  0.84,  $CH_2Cl_2$ );  $^1H$  NMR (400 MHz,  $CDCl_3$ )  $\delta$  7.84–7.79 (m, 2H), 7.75–7.71 (m, 2H), 7.44–7.18 (m, 15H), 4.62–4.54 (m, 1H), 3.34 (dt,  $J = 6.2, 9.5$  Hz, 1H), 3.20 (dt,  $J = 6.2, 9.5$  Hz, 1H), 2.22–2.14 (m, 1H), 1.87–1.79 (m, 1H), 1.29 (d,  $J = 6.3$  Hz, 3H);  $^{13}C$  NMR (100 MHz,  $CDCl_3$ )  $\delta$  164.2, 144.1, 134.3, 128.9, 128.6, 127.7, 126.8, 123.4, 86.6, 82.3, 60.0, 35.4, 18.9; IR ( $CH_2Cl_2$ ) 1790 (C=O), 1734 (C=O)  $cm^{-1}$ ; LRMS (EI, 20 eV)  $m/z$  243 (78), 241 (100), 237 (11), 234 ( $M^+ - Tr$ , 23); HRMS (EI, 20 eV) calcd for  $C_{12}H_{12}O_4$  ( $M^+ - Tr$ ) 234.0766, found 234.0760.

**Preparation of 34.** Following the procedure for the preparation of **33**, **34** was obtained from **32** as a solid (74% yield). M.p. 56–57 °C;  $[\alpha]_D^{20} = +7.0^\circ$  (*c* 0.73, CH<sub>2</sub>Cl<sub>2</sub>); <sup>1</sup>H NMR (400 MHz, CDCl<sub>3</sub>) δ 7.83–7.79 (m, 2H), 7.75–7.70 (m, 2H), 7.47–7.40 (m, 6H), 7.27–7.17 (m, 9H), 4.37–4.31 (m, 1H), 3.32 (dt, *J* = 6.5, 9.4 Hz, 1H), 3.25 (dt, *J* = 6.6, 9.4 Hz, 1H), 2.11–2.02 (m, 1H), 1.95–1.87 (m, 1H), 1.71–1.62 (m, 2H), 1.02 (t, *J* = 7.4 Hz, 3H); <sup>13</sup>C NMR (100 MHz, CDCl<sub>3</sub>) 164.1, 144.1, 134.2, 128.9, 128.5, 127.6, 126.8, 123.2, 86.9, 86.6, 60.2, 32.7, 25.6, 9.1; IR (CH<sub>2</sub>Cl<sub>2</sub>) 1791 (C=O), 1734 (C=O) cm<sup>-1</sup>; LRMS (EI, 20 eV) *m/z* 248 (M<sup>+</sup>–Tr, 21), 243 (100), 165 (27); HRMS (EI, 20 eV) calcd for C<sub>13</sub>H<sub>14</sub>O<sub>4</sub> (M<sup>+</sup>–Tr) 248.0923, found 248.0919.

**Preparation of 35.** To the solution of compound **33** (5.621 g, 11.78 mmol) in CH<sub>2</sub>Cl<sub>2</sub> (20 mL) was added HCOOH (20 mL). After kept stirring for 14 min at room temperature, the reaction was quenched with brine, and diluted with CH<sub>2</sub>Cl<sub>2</sub>. The organic layer was washed with brine, sat. NaHCO<sub>3</sub>, and brine again until pH 7, dried (MgSO<sub>4</sub>), concentrated in vacuum and purified by flash column chromatography (50% EtOAc in *n*-Hexane) to give **35** (2.022g, 73% yield) as a solid. M.p. 71–72 °C;  $[\alpha]_D^{20} = -35.7^\circ$  (*c* 0.93, CH<sub>2</sub>Cl<sub>2</sub>); <sup>1</sup>H NMR (300 MHz, CDCl<sub>3</sub>) δ 7.88–7.80 (m, 2H), 7.80–7.74 (m, 2H), 4.55–4.44 (m, 1H), 4.13–4.03 (m, 1H), 3.91–3.75 (m, 1H), 3.08 (t, *J* = 6.6 Hz, 1H), 1.97–1.86 (m, 2H), 1.41 (d, *J* = 6.2 Hz, 3H); <sup>13</sup>C NMR (75 MHz, CDCl<sub>3</sub>) δ 164.5, 134.6, 128.8, 123.6, 82.6, 58.7, 37.6, 19.7; IR (CH<sub>2</sub>Cl<sub>2</sub>) 3507 (br, O–H), 1790 (C=O), 1731 (C=O) cm<sup>-1</sup>; LRMS (EI, 20 eV) *m/z* 236 (M<sup>+</sup>+1, 0.7), 164 (12), 163 (100), 147 (7); HRMS (EI, 20 eV) calcd for C<sub>12</sub>H<sub>13</sub>O<sub>4</sub> (M<sup>+</sup>) 235.0845, found 235.0846.

**Preparation of 36.** Following the procedure for the preparation of **35**, **36** was obtained from **34** as a solid (75% yield). M.p. 45–46 °C;  $[\alpha]_D^{20} = -34.2^\circ$  (*c* 0.73, CH<sub>2</sub>Cl<sub>2</sub>); <sup>1</sup>H NMR (400 MHz, CDCl<sub>3</sub>) δ 7.87–7.82 (m, 2H), 7.79–7.74 (m, 2H), 4.35–4.29 (m, 1H), 4.13–4.06 (m, 1H), 3.84–3.80 (m, 1H), 3.25 (s, 1H), 1.93–1.76 (m, 4H), 1.01 (t, *J* = 7.4 Hz, 3H); <sup>13</sup>C NMR (100

MHz,  $\text{CDCl}_3$ )  $\delta$  164.7, 134.6, 128.8, 123.6, 87.2, 58.7, 34.2, 26.1, 8.7; IR ( $\text{CH}_2\text{Cl}_2$ ) 3513 (br, O–H), 1790 (C=O), 1730 (C=O)  $\text{cm}^{-1}$ ; LRMS (EI, 20 eV)  $m/z$  250 ( $\text{M}^+ + 1$ , 2), 163 (100), 162 (70), 132 (6); HRMS (EI, 20 eV) calcd for  $\text{C}_{13}\text{H}_{15}\text{O}_4$  ( $\text{M}^+$ ) 249.1001, found 249.1004.

**Preparation of 39.** To the solution of compound **35** (1.911 g, 8.13 mmol) in 6.43 mL of the solvent ( $\text{CH}_3\text{CN}/\text{CCl}_4/\text{H}_2\text{O}/\text{actone}=1/1/1.4/0.3$ ) were added  $\text{NaIO}_4$  (3.476 g, 16.25 mmol) and  $\text{RuO}_2 \cdot x\text{H}_2\text{O}$  (0.216 g, 1.62 mmol) at room temperature. After kept stirring for 5 h, the reaction was diluted with  $\text{CH}_2\text{Cl}_2$  and filtered on celite, dried ( $\text{MgSO}_4$ ) and concentrated in vacuum. The crude product **37** was used directly in next step without further purification.

To the stirred solution of compound **37** (8.13 mmol), 1-(3-dimethylaminopropyl)-3-ethylcarbodiimide hydrochloride (2.026 g, 10.57 mmol) and 1-hydroxy-7-azabenzotriazole (1.438 g, 10.57 mmol) in  $\text{CH}_2\text{Cl}_2$  (40 mL) was added cyclohexylamine (1.12 mL, 9.76 mmol) at room temperature. After kept stirring overnight, the reaction was diluted with  $\text{CH}_2\text{Cl}_2$ . The organic layer was washed with 5%  $\text{NaHCO}_3$  solution and brine, then dried ( $\text{MgSO}_4$ ), concentrated in vacuum and purified by flash column chromatography (25% EtOAc in  $\text{CH}_2\text{Cl}_2$ ) to give **39** (1.638g, 61% yield) as a solid. M.p. 182–183  $^\circ\text{C}$ ;  $[\alpha]_{\text{D}}^{20} = +85.8^\circ$  ( $c$  0.80,  $\text{CH}_2\text{Cl}_2$ );  $^1\text{H}$  NMR (400 MHz,  $\text{CDCl}_3$ )  $\delta$  7.88–7.84 (m, 2H), 7.81–7.77 (m, 2H), 7.03 (d,  $J = 7.3$  Hz, 1H), 4.74–4.65 (m, 1H), 3.85–3.74 (m, 1H), 2.58 (d,  $J = 5.1$  Hz, 2H), 1.93–1.92 (m, 2H), 1.75–1.71 (m, 2H), 1.63–1.52 (m, 1H), 1.45 (d,  $J = 6.4$  Hz, 3H), 1.39–1.09 (m, 5H);  $^{13}\text{C}$  NMR (100 MHz,  $\text{CDCl}_3$ )  $\delta$  168.0, 164.5, 134.7, 128.8, 123.7, 81.6, 48.3, 42.1, 32.9, 32.8, 25.5, 24.8, 18.3; IR ( $\text{CH}_2\text{Cl}_2$ ) 3428 (br, N–H), 3367 (br, N–H), 1791 (C=O), 1734 (C=O), 1662 (C=O)  $\text{cm}^{-1}$ ; LRMS (EI, 20 eV)  $m/z$  330 ( $\text{M}^+$ , 19), 168 (100), 152 (67), 139 (50); HRMS (EI, 20 eV) calcd for  $\text{C}_{18}\text{H}_{22}\text{N}_2\text{O}_4$  ( $\text{M}^+$ ) 330.1580, found 330.1584.

**Preparation of 40.** Following the procedure for the preparation of **39**, **40** was obtained from **38** as a solid. A small part of crude product was purified by crystallization in CH<sub>2</sub>Cl<sub>2</sub>/hexane. Others were used in the next step without further purification. M.p. 153–154 °C; [ $\alpha$ ]<sub>D</sub><sup>20</sup> = + 94.9° (c 0.62, CH<sub>2</sub>Cl<sub>2</sub>); <sup>1</sup>H NMR (400 MHz, CDCl<sub>3</sub>) δ 7.88–7.83 (m, 2H), 7.80–7.77 (m, 2H), 7.10 (d, *J* = 7.4 Hz, 1H), 4.48–4.42 (m, 1H), 3.82–3.73 (m, 1H), 2.62 (dd, *J* = 3.1, 15.5 Hz, 1H), 2.55 (dd, *J* = 6.2, 15.5 Hz, 1H), 1.93–1.91 (m, 2H), 1.87–1.70 (m, 4H), 1.64–1.58 (m, 1H), 1.38–1.22 (m, 5H), 1.13 (t, *J* = 7.4 Hz, 3H); <sup>13</sup>C NMR (100 MHz, CDCl<sub>3</sub>) δ 168.2, 164.6, 134.7, 128.8, 123.7, 86.8, 48.3, 40.1, 32.9, 32.8, 25.6, 25.4, 24.9, 9.8; IR (CH<sub>2</sub>Cl<sub>2</sub>) 3428 (br, N–H), 3357 (br, N–H), 1790 (C=O), 1734 (C=O), 1657 (C=O) cm<sup>–1</sup>; LRMS (EI, 20 eV) *m/z* 344 (M<sup>+</sup>, 5), 182 (100), 168 (27), 147 (23); HRMS (EI, 20 eV) calcd for C<sub>19</sub>H<sub>24</sub>N<sub>2</sub>O<sub>4</sub> (M<sup>+</sup>) 344.1736, found 344.1733.

**Preparation of 43.** To a stirred solution of compound **39** (0.300 g, 0.91 mmol) in CH<sub>3</sub>OH (2 mL) and CH<sub>2</sub>Cl<sub>2</sub> (2 mL) was added NH<sub>2</sub>NH<sub>2</sub>·H<sub>2</sub>O (0.132 mL, 2.73 mmol). After kept stirring at room temperature for 1.5 h, the reaction was diluted with CH<sub>2</sub>Cl<sub>2</sub>, washed with 5% NaHCO<sub>3</sub> and brine, then dried (MgSO<sub>4</sub>) and concentrated to give **41**, which was used directly in the next step.

To the stirred solution of *iso*-butyric acid (0.093 mL, 0.999 mmol), 1-(3-dimethylaminopropyl)-3-ethylcarbodiimide hydrochloride (0.226 g, 1.18 mmol) and 1-hydroxy-7-azabenzotriazole (0.161 g, 1.18 mmol) in CH<sub>2</sub>Cl<sub>2</sub> (5 mL) was added a solution of compound **41** in CH<sub>2</sub>Cl<sub>2</sub> (3 mL) at room temperature. After kept stirring overnight, the reaction was diluted with CH<sub>2</sub>Cl<sub>2</sub>. The organic layer was washed with 5% NaHCO<sub>3</sub> and brine, then dried (MgSO<sub>4</sub>), concentrated in vacuum and purified by flash column chromatography (50% EtOAc in CH<sub>2</sub>Cl<sub>2</sub>) to give **43** (0.125g, 51% yield) as a solid. M.p. 166–167 °C; [ $\alpha$ ]<sub>D</sub><sup>20</sup> = + 5.8° (c 0.99, CH<sub>2</sub>Cl<sub>2</sub>); <sup>1</sup>H NMR (400 MHz, CDCl<sub>3</sub>) δ 9.24 (s, 1H), 8.02 (d, *J* = 6.8 Hz, 1H), 4.24–4.21 (m, 1H), 3.79–3.71 (m, 1H), 2.48 (dd, *J* = 2.4, 15.8 Hz, 1H), 2.40–2.31 (m, 2H), 1.90–1.88 (m, 2H), 1.75–1.68 (m,



2H), 1.62–1.59 (m, 1H), 1.42–1.12 (m, 5H), 1.27 (d,  $J = 6.3$  Hz, 3H), 1.18 (d,  $J = 6.8$  Hz, 3H), 1.17 (d,  $J = 6.8$  Hz, 3H);  $^{13}\text{C}$  NMR (100 MHz,  $\text{CDCl}_3$ )  $\delta$  176.1, 169.2, 78.4, 48.6, 41.9, 32.8, 32.7, 32.5, 25.5, 25.1, 19.4, 19.2, 18.3; IR ( $\text{CH}_2\text{Cl}_2$ , 2 mM) 3428 (br, N–H), 3391 (br, N–H), 3302 (br, N–H), 1694 (C=O), 1652 (C=O)  $\text{cm}^{-1}$ ; LRMS (EI, 20 eV)  $m/z$  270 ( $\text{M}^+$ , 13), 168 (79), 152 (100), 104 (64); HRMS (EI, 20 eV) calcd for  $\text{C}_{14}\text{H}_{26}\text{N}_2\text{O}_3$  ( $\text{M}^+$ ) 270.1943, found 270.1932.

**Preparation of 44.** Following the procedure for the preparation of **43**, **44** was obtained from **40** as a solid (39% overall yield for four steps from compound **36**). M.p. 164–165 °C;  $[\alpha]_{\text{D}}^{20} = +5.7^\circ$  ( $c$  1.04,  $\text{CH}_2\text{Cl}_2$ );  $^1\text{H}$  NMR (400 MHz,  $\text{CDCl}_3$ )  $\delta$  9.75 (s, 1H), 8.32 (d,  $J = 7.5$  Hz, 1H), 3.97–3.94 (m, 1H), 3.74–3.70 (m, 1H), 2.51 (dd,  $J = 2.3, 5.7$  Hz, 1H), 2.43–2.28 (m, 2H), 1.89–1.87 (m, 2H), 1.75–1.52 (m, 5H), 1.39–1.11 (m, 5H), 1.17 (d,  $J = 6.8$  Hz, 3H), 1.16 (d,  $J = 6.8$  Hz, 3H), 0.95 (t,  $J = 7.4$  Hz, 3H);  $^{13}\text{C}$  NMR (100 MHz,  $\text{CDCl}_3$ )  $\delta$  176.2, 169.4, 83.5, 48.6, 39.5, 32.7, 32.6, 32.4, 25.4, 25.0, 19.4, 19.2, 9.6; IR ( $\text{CH}_2\text{Cl}_2$ , 2 mM) 3426 (br, N–H), 3389 (br, N–H), 3302 (br, N–H), 1693 (C=O), 1651 (C=O)  $\text{cm}^{-1}$ ; LRMS (EI, 20 eV)  $m/z$  284 ( $\text{M}^+$ , 8), 182 (100), 152 (74), 116 (39); HRMS (EI, 20 eV) calcd for  $\text{C}_{15}\text{H}_{28}\text{N}_2\text{O}_3$  ( $\text{M}^+$ ) 284.2100, found 284.2091.

**Preparation of 45.** Following the procedure for the preparation of **43**, **45** was obtained from **39** as a solid (54% yield). M.p. 148–149 °C;  $[\alpha]_{\text{D}}^{20} = +74.8^\circ$  ( $c$  0.80,  $\text{CH}_2\text{Cl}_2$ );  $^1\text{H}$  NMR (400 MHz,  $\text{CDCl}_3$ )  $\delta$  10.57 (s, 1H), 8.21 (d,  $J = 7.8$  Hz, 1H), 7.88–7.84 (m, 2H), 7.83–7.79 (m, 2H), 4.72–4.66 (m, 1H), 4.34–4.27 (m, 1H), 3.77–3.75 (m, 1H), 2.66 (dd,  $J = 6.4, 15.5$  Hz, 1H), 2.60 (dd,  $J = 4.2, 15.5$  Hz, 1H), 2.51 (dd,  $J = 3.5, 16.4$  Hz, 1H), 2.45 (dd,  $J = 7.2, 16.4$  Hz, 1H), 1.89–1.88 (m, 2H), 1.72–1.69 (m, 2H), 1.60–1.57 (m, 1H), 1.49 (d,  $J = 6.4$  Hz, 3H), 1.38–1.16 (m, 5H), 1.33 (d,  $J = 6.3$  Hz, 3H);  $^{13}\text{C}$  NMR (100 MHz,  $\text{CDCl}_3$ )  $\delta$  169.0, 167.7, 164.6, 134.9, 128.5, 123.8, 81.2, 78.3, 48.4, 41.8, 39.4, 32.6, 32.6, 25.4, 25.0, 18.5, 18.3; IR ( $\text{CH}_2\text{Cl}_2$ )

3294 (br, N–H), 1791 (C=O), 1732 (C=O), 1678 (C=O), 1651 (C=O)  $\text{cm}^{-1}$ ; LRMS (EI, 20 eV)  $m/z$  431 ( $\text{M}^+$ , 2), 168 (69), 163 (100), 152 (41); HRMS (EI, 20 eV) calcd for  $\text{C}_{22}\text{H}_{29}\text{N}_3\text{O}_6$  ( $\text{M}^+$ ) 431.2056, found 431.2067.

**Preparation of 46.** Following the procedure for the preparation of **43**, **46** was obtained from **45** as a solid (50% yield). M.p. 189–190  $^{\circ}\text{C}$ ;  $[\alpha]_{\text{D}}^{20} = -5.26^{\circ}$  ( $c$  0.60, EtOH);  $^1\text{H}$  NMR (400 MHz,  $\text{CDCl}_3$ )  $\delta$  11.89 (s, 1H), 9.19 (s, 1H), 8.39 (d,  $J = 7.5$  Hz, 1H), 4.32–4.25 (m, 1H), 4.22–4.15 (m, 1H), 3.77–3.75 (m, 1H), 2.54–2.32 (m, 5H), 1.91–1.89 (m, 2H), 1.74–1.70 (m, 2H), 1.61–1.58 (m, 1H), 1.38–1.13 (m, 5H), 1.31 (d,  $J = 6.2$  Hz, 3H), 1.30 (d,  $J = 6.2$  Hz, 3H), 1.19 (d,  $J = 6.8$  Hz, 3H), 1.18 (d,  $J = 6.8$  Hz, 3H);  $^{13}\text{C}$  NMR (100 MHz,  $\text{CDCl}_3$ )  $\delta$  177.4, 169.4, 167.9, 78.2, 77.9, 48.5, 41.8, 39.8, 32.8, 32.8, 32.4, 25.5, 25.2, 19.3, 19.2, 18.5, 18.3; IR ( $\text{CH}_2\text{Cl}_2$ ) 3386 (br, N–H), 3288 (br, N–H), 3189 (br, N–H), 1667 (C=O), 1658 (C=O), 1649 (C=O)  $\text{cm}^{-1}$ ; LRMS (EI, 20 eV)  $m/z$  371 ( $\text{M}^+$ , 4), 200 (67), 168 (100), 152 (68); HRMS (EI, 20 eV) calcd for  $\text{C}_{18}\text{H}_{33}\text{N}_3\text{O}_5$  ( $\text{M}^+$ ) 371.2420, found 371.2411.

## References:

1. Yang, D.; Li, B.; Ng, F.-F.; Yan, Y.-L.; Qu, J.; Wu, Y.-D. *J. Org. Chem.* **2001**, 66, 7303.
2. Medson, C.; Smallridge, A. J.; Trehwella, M. A. *Tetrahedron: Asymmetry* **1997**, 8, 1049.
3. Genêt, J. P.; Ratovelomanana-Vidal, V.; Caño de Andrade, M. C.; Pfister, X.; Guerreiro, P.; Lenoir, J. Y. *Tetrahedron Lett.* **1995**, 36, 4801.
4. O'Neill, J. A.; Lindell, S. D.; Simpson, T. J.; Willis, C. L. *Tetrahedron: Asymmetry* **1994**, 5, 117.
5. Mellin, M.; Davidson, M.; Lumbroso, D.; Giuliani, P.; Coussemant, F. *Bull. Soc. Chim. Fr.* **1964**, 2974.
6. Mori, K.; Miyake, M. *Tetrahedron* **1987**, 43, 2229.

### Determination of optical purity of **13** and **14** by $^1\text{H}$ NMR spectroscopy

Since the racemic diamides **16** and **17** of  $\beta^3$ -aminoxy acids cannot be base-line separated by HPLC columns (Chiracel OD and (*R, R*) Whelk-O 1), we resorted to derivatize  $\beta^3$ -aminoxy acids with suitable chiral reagents, and the diastereoisomeric excess of the corresponding diamides was examined by  $^1\text{H}$  NMR spectroscopy. For this purpose, (*S*)-leucine methyl ester and (*S*)-phenylglycine methyl ester reacted with the lactams **13** and **14** to give the diastereomers **48** and **49**, respectively (Scheme 1), and the de % value was determined by the integration of  $\alpha$ -protons of the (*S*)-amino acids or methylene protons of Cbz group of the crude products. The results are shown in Table 1.

#### Scheme 1

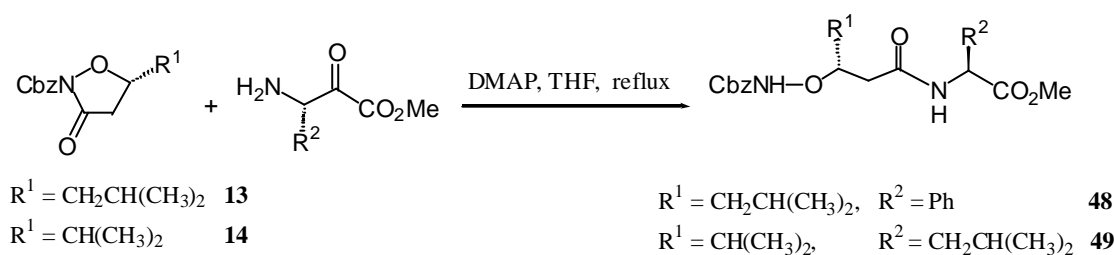

The Cbz regions of the  $^1\text{H}$  NMR (500 MHz) spectra of (*R/S, S*)-**48** and (*R, S*)-**48** are showed in Figure 1. And the  $\alpha$ -CH (*L*-Leu) regions of the  $^1\text{H}$  NMR (500 MHz) spectra of (*R/S, S*)-**49** and (*R, S*)-**49** are shown in Figure 2.

The  $^1\text{H}$  NMR spectra of (*R/S, S*)-**48** showed two well-separated AB quartet peaks of different patterns at 5.17 ppm and 5.10 ppm, respectively, and the integration ratio of these two signals was almost 1:1. These two signals were assigned to the protons of Cbz group. The integration ratio of these two signals in the  $^1\text{H}$  NMR spectra of (*R, S*)-**48** was about 1:39.3.

The  $^1\text{H}$  NMR spectra of (*R/S*, *S*)-**49** contained two well-separated ddd peaks at 3.92 ppm and 3.86 ppm, respectively, and the integration ratio of these two signals was almost 1:1. These two signals were assigned to the  $\alpha$ -CH's of *L*-Leu residue. The integration ratio of these two signals in the  $^1\text{H}$  NMR spectra of (*R*, *S*)-**48** was about 1:34.8.

**Table 1.** Diastereomeric excess determination of  $\beta^3$ -aminoxy diamides **47** and **48**

| $\alpha$ -aminoxy acid                                                              | lactam                                                                                           | diastereomer                                                                                     | ee % of $\alpha$ -aminoxy acid<br>(by HPLC) | de % of $\beta^3$ -aminoxy acid<br>(by $^1\text{H}$ NMR) |
|-------------------------------------------------------------------------------------|--------------------------------------------------------------------------------------------------|--------------------------------------------------------------------------------------------------|---------------------------------------------|----------------------------------------------------------|
| 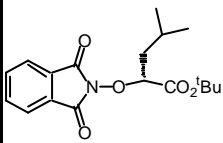  | <br><b>13</b>  | <br><b>48</b>  | 98.6                                        | 98.6                                                     |
|  | <br><b>14</b> | <br><b>49</b> | 95.8                                        | 95.8                                                     |

**Figure 1.** Cbz regions of the  $^1\text{H}$  NMR (500 MHz) spectra of (*R, S*)-**48** and (*R/S, S*)-**48**.

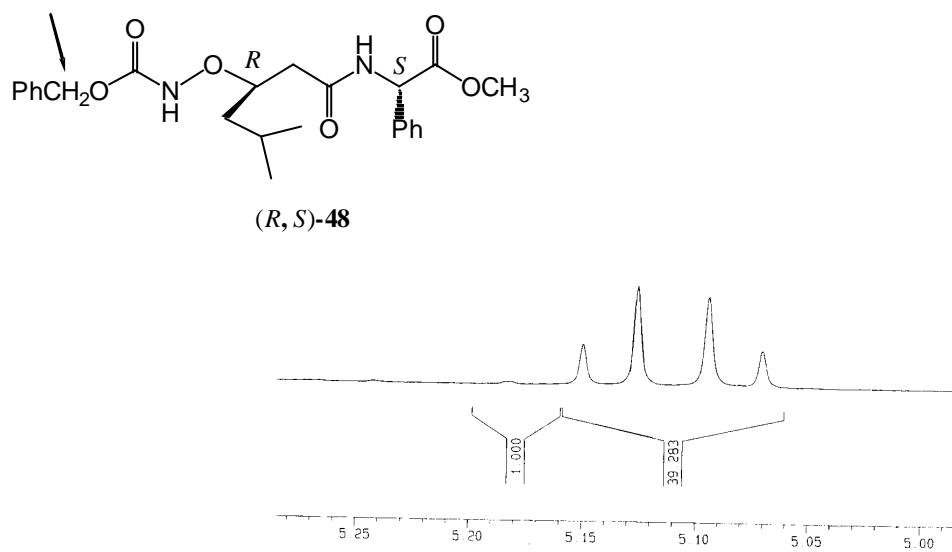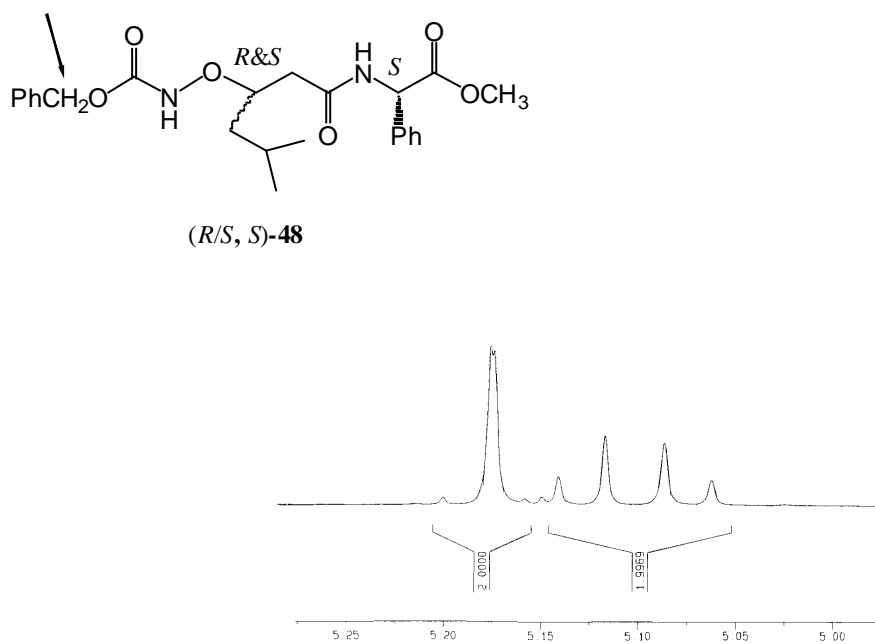

**Figure 2.**  $\alpha$ -CH regions of the  $^1\text{H}$  NMR spectra (500 MHz) of (*R, S*)-**49** and (*R/S, S*)-**49**.

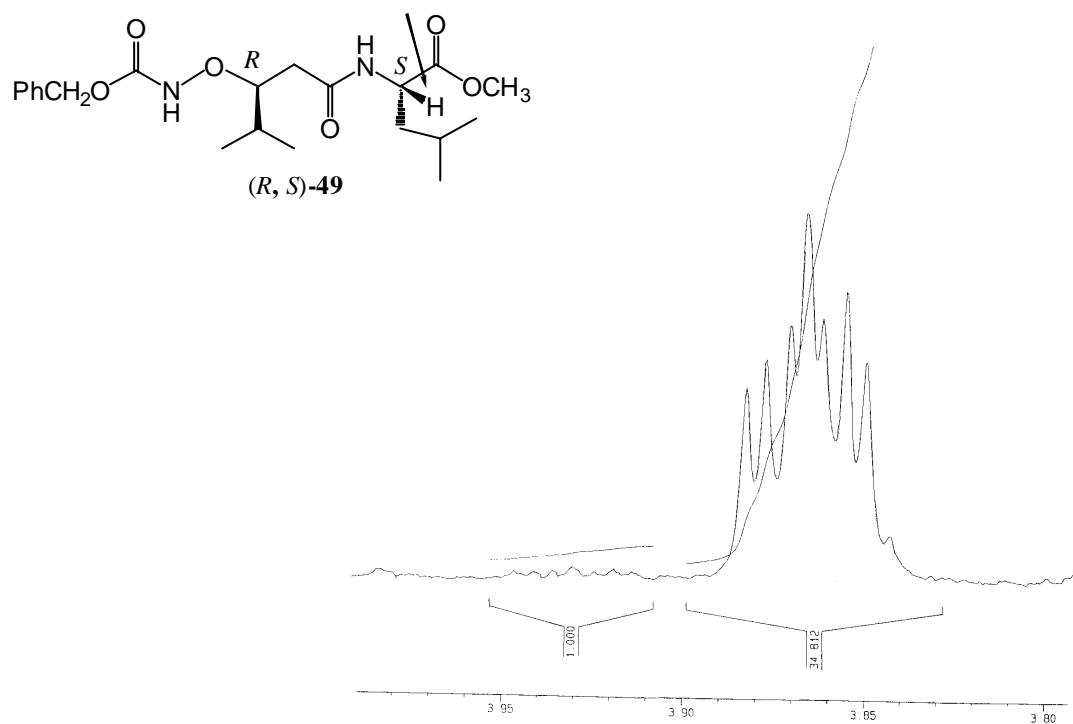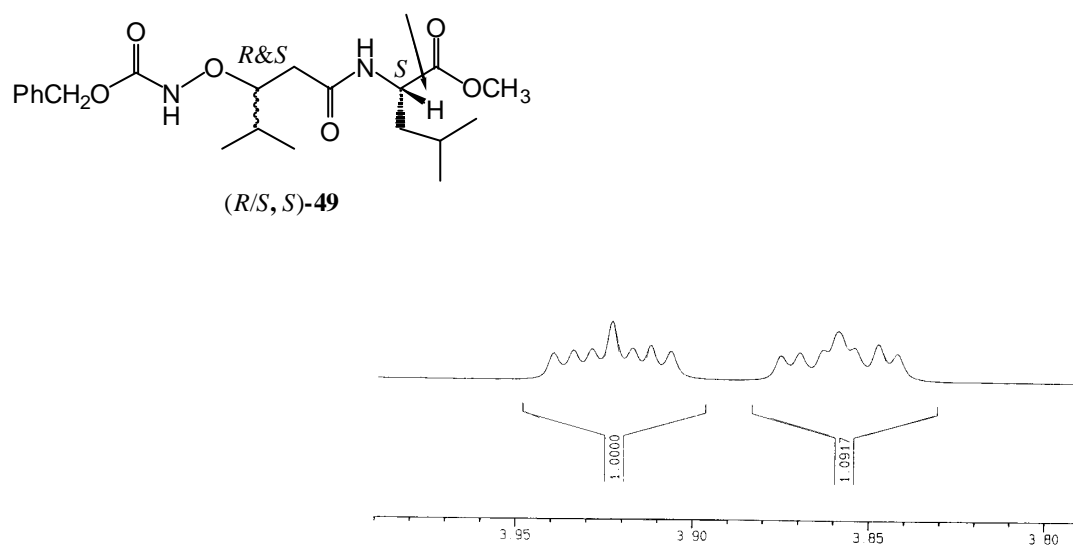

## Determination of enantiomeric excess of compound 27 by HPLC

### HPLC Conditions:

Column: Chiral OD (Column No. OD00CE-AH045)

Solvents: *n*-Hexane/*i*-PrOH (98.0/2.0)

Flow rate: 0.3 mL/min

Detection: UV 243 nm

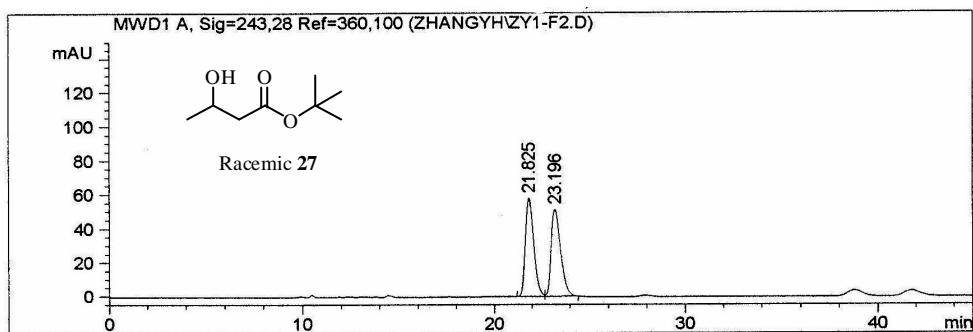

| Peak # | RetTime [min] | Type | Width [min] | Area [mAU*s] | Height [mAU] | Area %  |
|--------|---------------|------|-------------|--------------|--------------|---------|
| 1      | 21.825        | BV   | 0.4734      | 1801.41882   | 58.15118     | 50.0003 |
| 2      | 23.196        | VB   | 0.5356      | 1801.40063   | 51.56609     | 49.9997 |

Totals : 3602.81946 109.71727

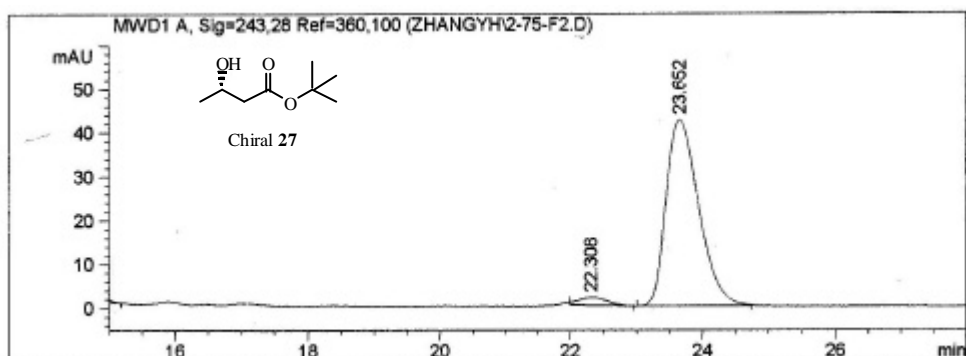

| Peak # | RetTime [min] | Type | Width [min] | Area [mAU*s] | Height [mAU] | Area %  |
|--------|---------------|------|-------------|--------------|--------------|---------|
| 1      | 11.898        | PB   | 0.3397      | 32.83032     | 1.43060      | 2.0108  |
| 2      | 12.654        | BB   | 0.2984      | 27.98365     | 1.36962      | 1.7140  |
| 3      | 14.649        | BB   | 0.3330      | 60.67344     | 2.71176      | 3.7162  |
| 4      | 22.308        | BB   | 0.4442      | 56.56086     | 1.81194      | 3.4643  |
| 5      | 23.652        | PB   | 0.5366      | 1454.61401   | 42.36550     | 89.0946 |

Totals : 1632.66228 49.68943
